# Supplementary material
Source: HighWire-hosted journal article supplement (https://bmjopenquality.bmj.com/highwire/filestream/135905/field_highwire_adjunct_files/1/ds5844.docx)
Supplement: ds5844.docx [file ds5844.docx]

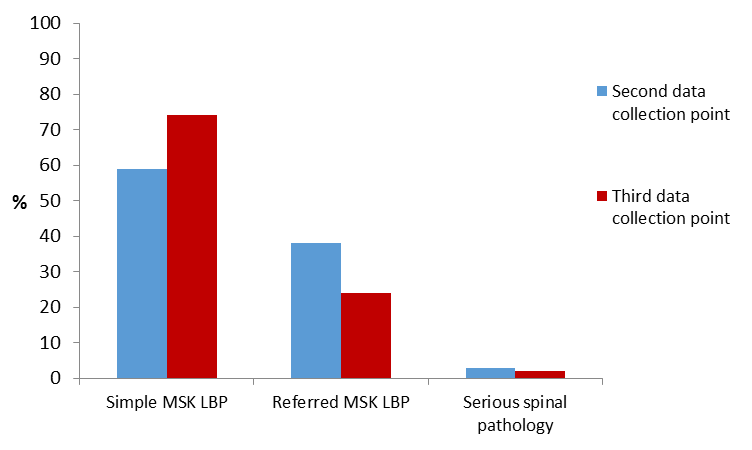


**Figure 1: Distribution of MSK LBP types at the second and third data collection points (pre and post implementation) of the EBLBPP (n=200)**

| **Second Data Collection Point** Mean age, SD (min age; max age) | **Third Data Collection Point** Mean age, SD (min age; max age) |
| --- | --- |
|
| 41  | 46  17 (22; 91) |

**Figure 2: Demographic data between the second and third data (pre and post implementation) collection points**

| History | 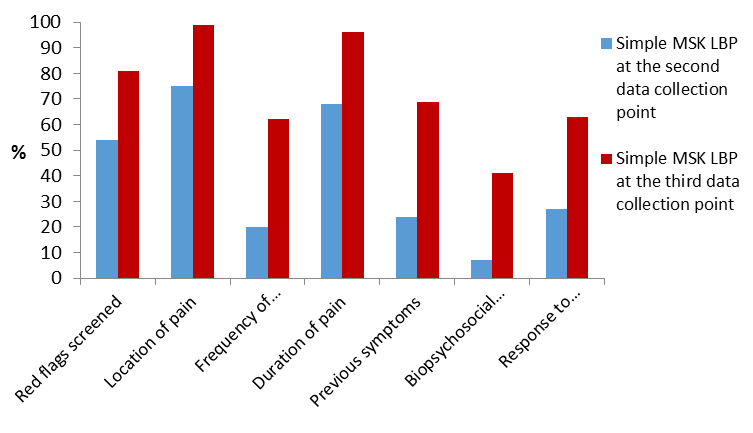 | 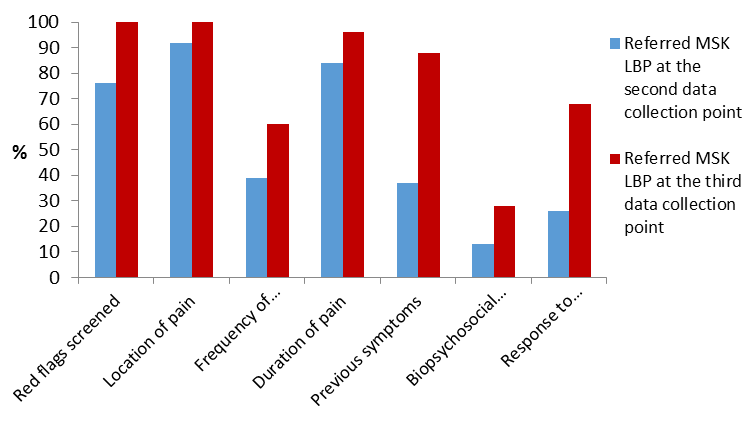 | 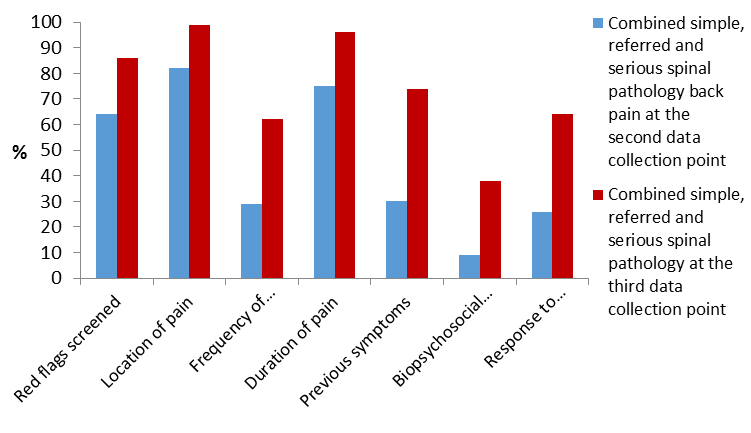 |
| --- | --- | --- | --- |
| Examination | 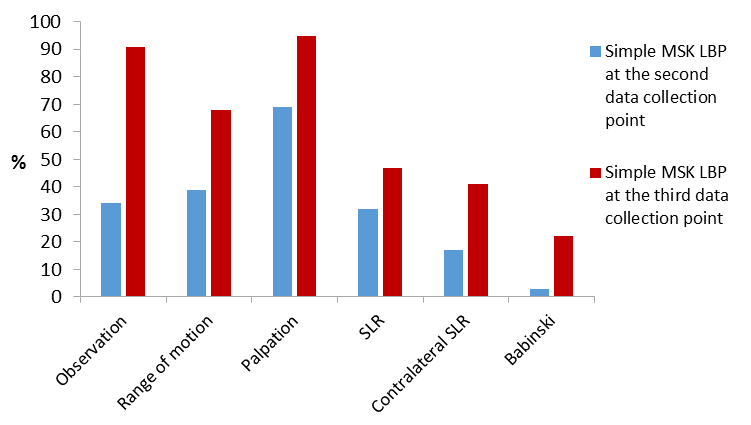 | 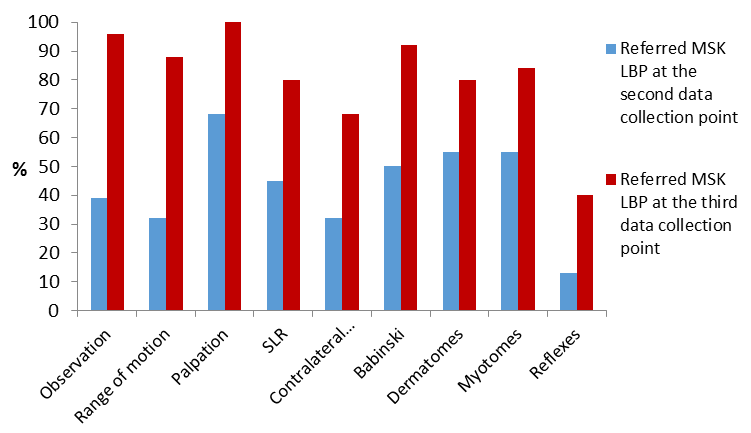 | 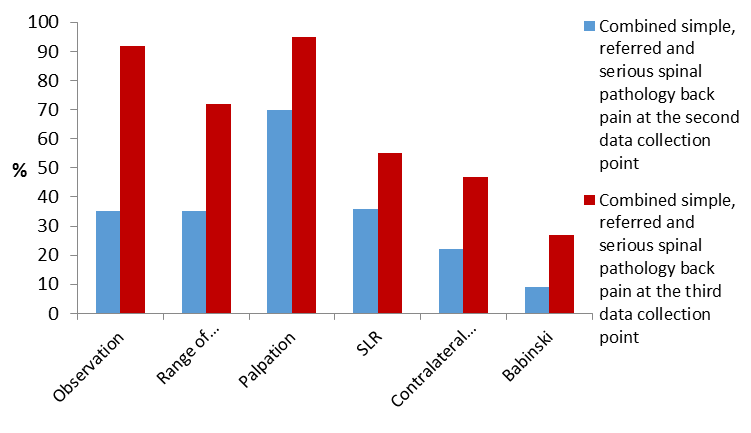 |
| Classification | 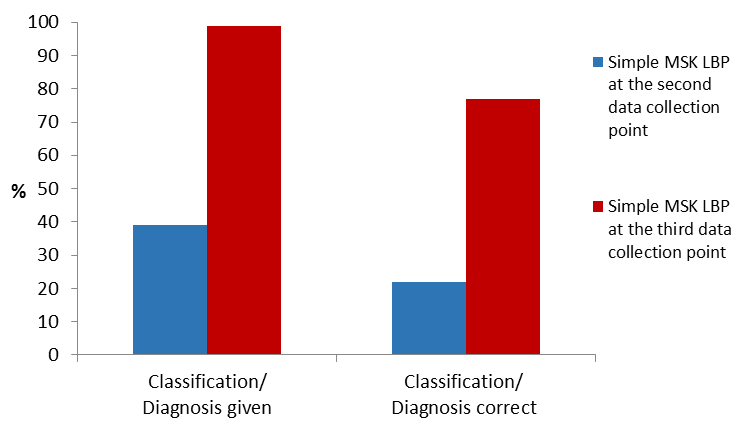 | 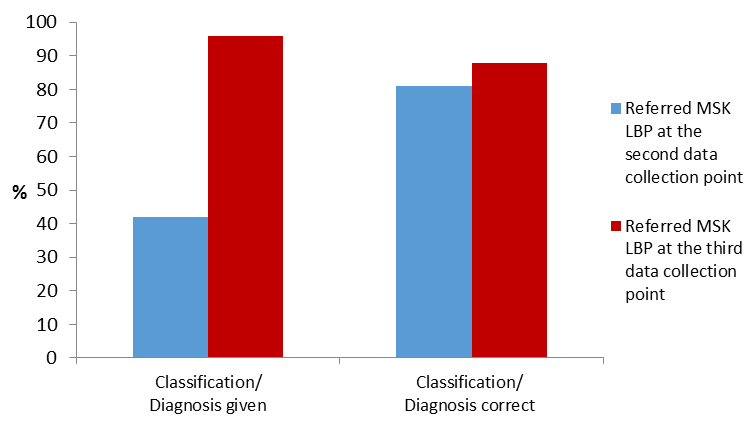 | 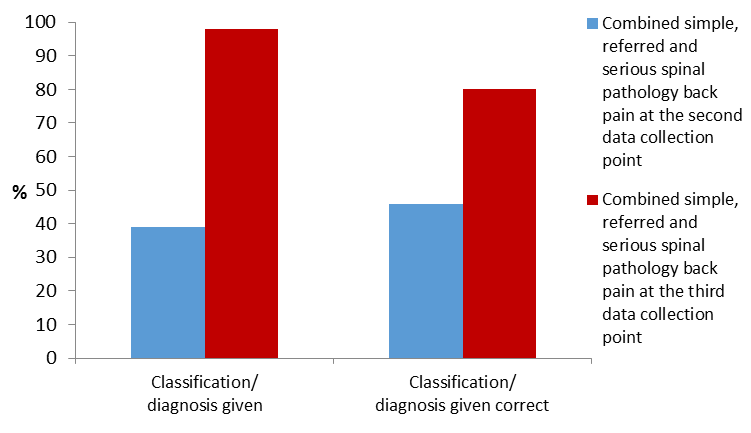 |
| Investigations | 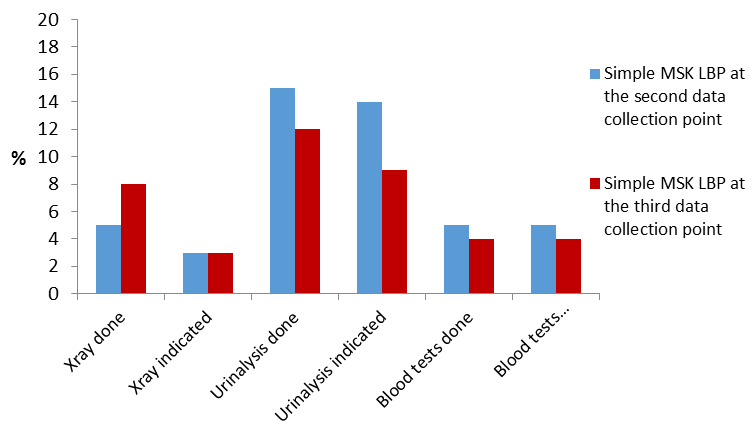 | 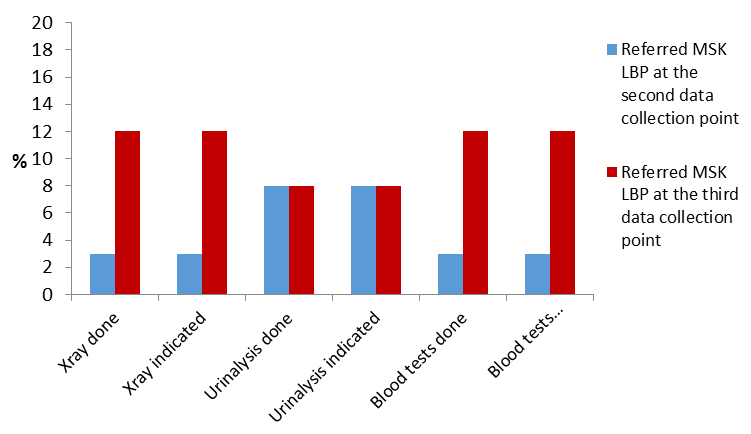 | 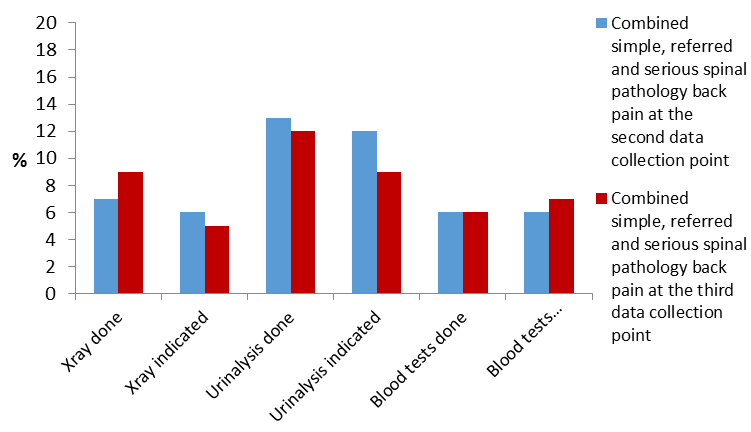 |
| Management | 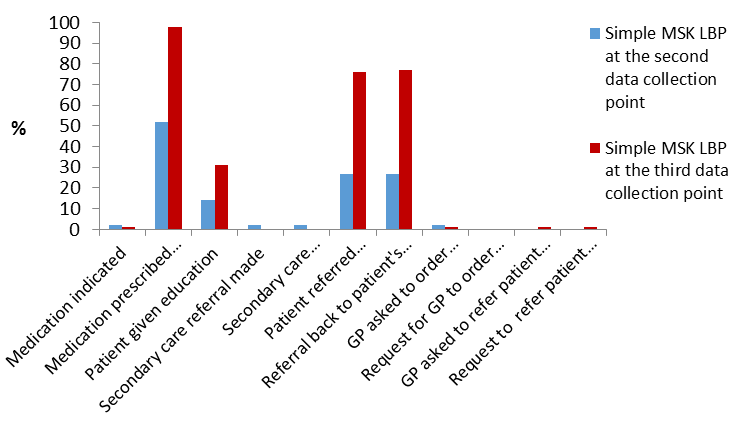 | 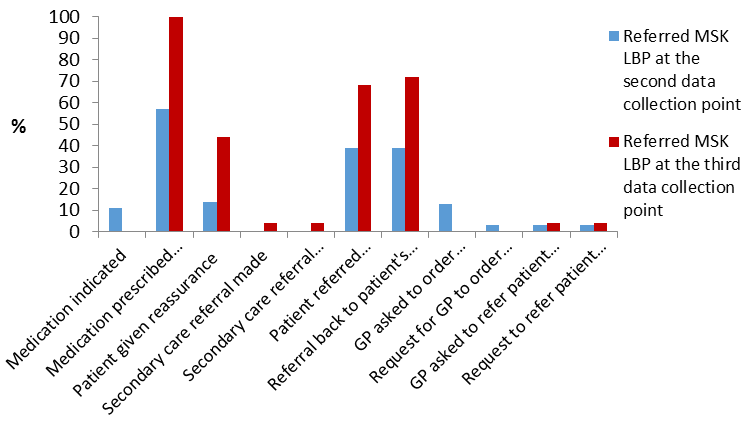 | 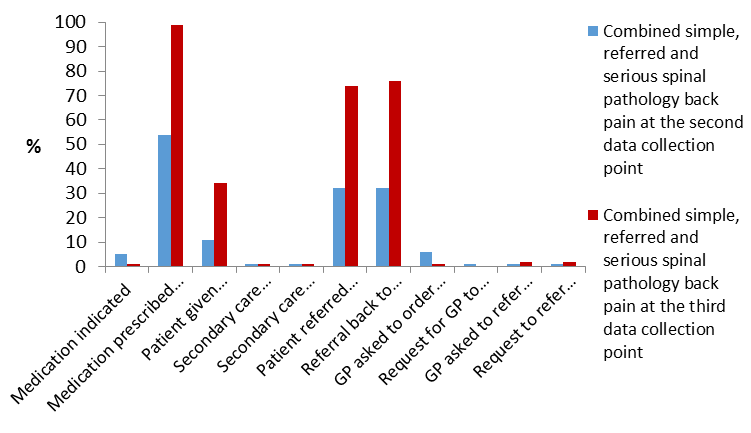 |

**Figure 3: The percentages of success in the areas evaluated at the second and third data collection points (before and after implementation of EBLBPP, staff education and patient education booklet by types of LBP: in simple, referred and combined simple, referred and serious spinal pathology MSK back pain)**

|  | **Simple**  **(n=133: SDCP=59, TDCP=74)**  **Difference (95% CI)** | **Referred**  **(n=62, SDCP=38, TDCP=24)**  **Difference (95% CI)** | **All****  **(n=200)**  **Difference (95% CI)** |
| --- | --- | --- | --- |
| **History** |  |  |  |
| Red flags screened | 27 (11, 42) (††) | 24 (10, 37) (††) | 22 (10, 34) (††) |
| Location of pain | 24 (13, 35) (†††) | 8 (-1, 16) | 17 (9, 25) (†††) |
| Frequency of symptoms | 41 (26, 56) (†††) | 21 (-4, 45) | 33 (20, 46) |
| Duration of pain | 28 (15, 41) (†††) | 12 (-2, 26) | 21 (12, 30) (†††) |
| Previous symptoms | 45 (30, 60) (†††) | 51 (30, 71) (†††) | 44 (31, 56) (†††) |
| Biopsychosocial factors | 34 (21, 47) (†††) | 15 (-6, 35) | 29 (18, 40) (†††) |
| Response to previous treatment | 35 (19, 51) (†††) | 42 (19, 65) (††) | 38 (25, 51) (†††) |
| **Examination** |  |  |  |
| Observation | 57 (43, 70) (†††) | 57 (39, 74) (†††) | 57 (46, 68) (†††) |
| Range of motion | 29 (12, 45) (†) | 56 (37, 76) (†††) | 37 (24, 50) (†††) |
| Palpation | 25 (12, 38) (†††) | 32 (17, 46) (††) | 25 (15, 35) (†††) |
| SLR | 15 (-1, 32) | 35 (13, 58) (††) | 19 (5, 33) (†) |
| Contralateral SLR | 24 (9, 39) (†) | 36 (13, 60) (††) | 25 (13, 38) (†††) |
| Dermatomes | - | 42 (23, 61) (††) | - |
| Myotomes | - | 25 (2, 47) | - |
| Reflexes | - | 29 (7, 50) (††) | - |
| Babinski | 19 (8, 29) (†) | 27 (5, 49) (††) | 18 (8, 29) (†††) |
| **Classification** |  |  |  |
| Classification/Diagnosis given | 60 (47, 72) (†††) | 54 (36, 71) (†††) | 59 (49, 69) (†††) |
| Classification/Diagnosis correct | 55 (36, 74) (†††) | 6 (-17, 30) | 33 (16, 51) (†††) |
| **Investigations** |  |  |  |
| Xray done | 3 (-5, 11) | 9 (-4, 23) | 2 (-6, 10) |
| Xray indicated | -1 (-7, 5) | 9 (-4, 23) | -1 (-7, 5) |
| Urinalysis done | -3 (-15, 9) | -0.01 (-14, 14) | -1 (-10, 8) |
| Urinalysis indicated | -4 (-15, 7) | -0.01 (-14, 14) | -3 (-11, 5) |
| Blood tests done | -1 (-8, 6) | 9 (-4, 23) | 0 (-7, 7) |
| Blood tests indicated | -1 (-8, 6) | 9 (-4, 23) | 1 (-6, 8) |
| **Management** |  |  |  |
| Medication indicated | -0.3 (-5, 4) | -11 (-20, -0.7) | -4 (-9, 1) |
| Medication prescribed followed analgesic ladder recommendations | 49 (36, 62) (†††) | 43 (26, 59) (†††) | 45 (35, 55) (†††) |
| Patient given education and reassurance | 18 (4, 31) (†) | 36 (15, 57) (††) | 23 (12, 34) (†††) |
| Secondary care referral made | -2 (-5, 2) | 4 (-4, 12) | 0 (3, 3) |
| Secondary care referral indicated | -2 (-5, 2) | 4 (-4, 12) | 0% (-3%, 3%) |
| Patient referred back to their GP | 49 (34, 64) (†††) | 29 (5, 53) (†) | 42 (29, 54) (†††) |
| Referral back to patient's GP indicated | 50 (35, 65) (†††) | 33 (9, 56) (†) | 44 (31, 56) (†††) |
| GP asked to order investigations | -0.3 (-5, 4) | -13 (-24, -2) | -5 (-10, 0) |
| Request for GP to order investigations indicated | * | -3 (-8, 2) | -1 (-3, 1) |
| GP asked to refer patient to secondary care | 1 (-1, 4) | 1 (-8, 11) | 1 (-2, 4) |
| Request to refer patient to secondary care indicated | 1 (-1, 4) | 1 (-8, 11) | 1 (-2, 4) |

***:** Unable to calculate CI due to no occurrence at either time point due to small numbers

****:**  includes simple, referred and serious spinal pathology

Statistical significance level: p-value < 0.05(+), p-value < 0.01 (++), p-value <0.001 (+++). Confidence interval obtained using Normal approximation to binomial distribution.

SDCP = Second data collection point

TDCP = Third data collection point

**Table 1: Estimates of the difference in proportion in the areas evaluated between the second and third data collection points (pre and post implementation EBLBPP, staff education and patient education leaflet) by types of LBP: in simple, referred and combined simple, referred and serious spinal pathology MSK back pain**
